# Supplementary material for: The Impact of ATRA on Shaping Human Myeloid Cell Responses to Epithelial Cell‐Derived Stimuli and on T‐Lymphocyte Polarization
Source: Hindawi journal article supplement (doi:10.1155/2015/579830), 2015-01-01
Supplement: f1 [file 579830.f1.pdf]

Supplementary Figure 1

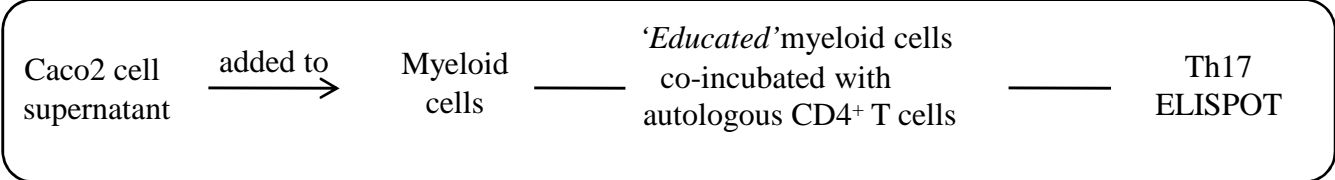

Supplementary Figure 2

**A**

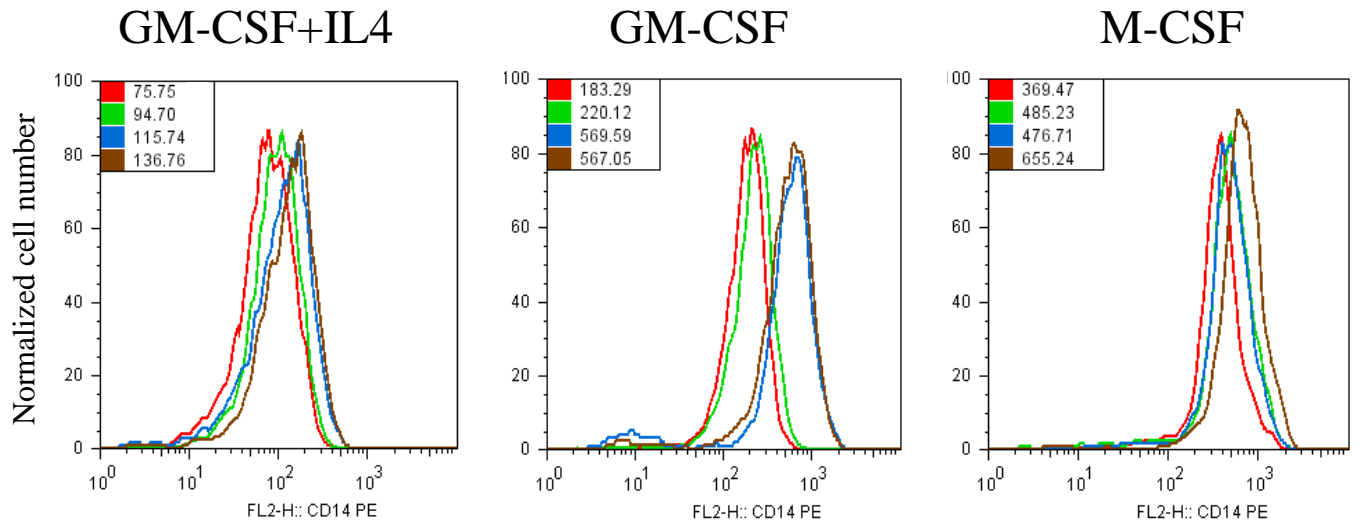

CD14

**B**

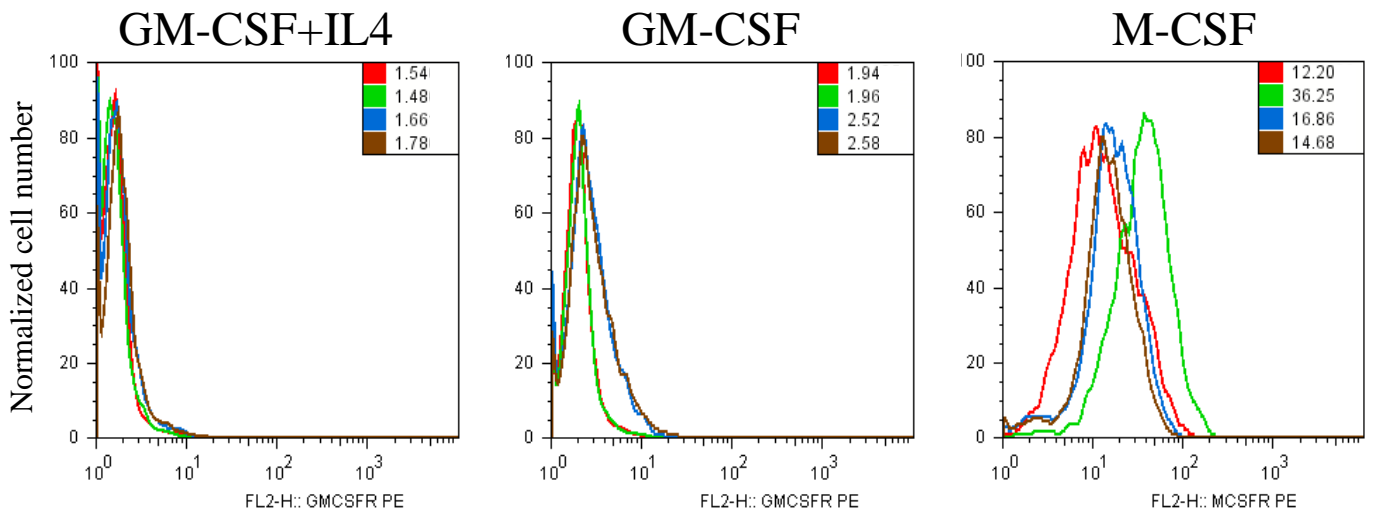

CSF-R

Supplementary Figure 3

**A**

**GM-CSF+IL4**

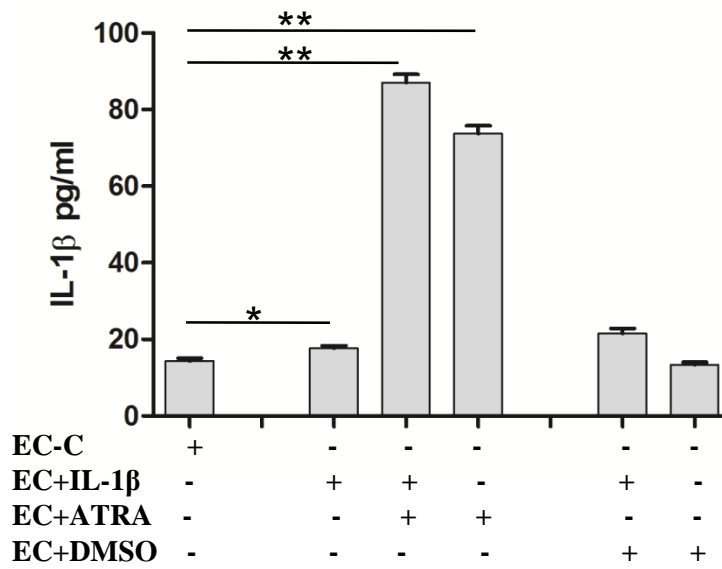

**B**

**GM-CSF**

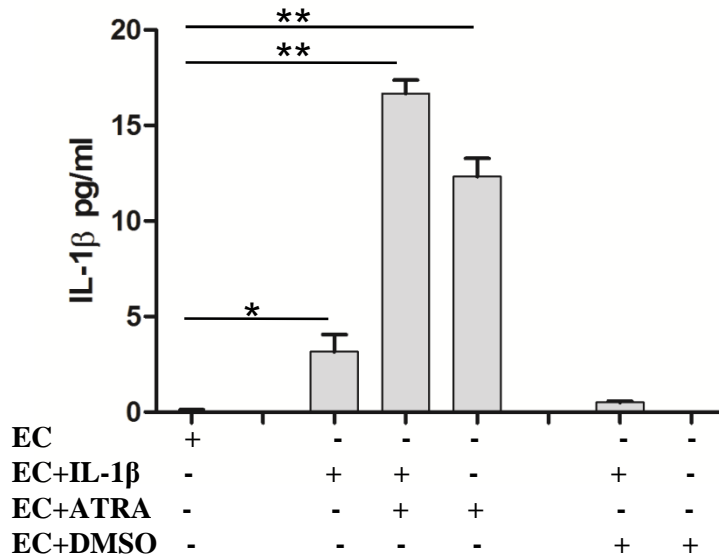

# Supplementary Figure 4

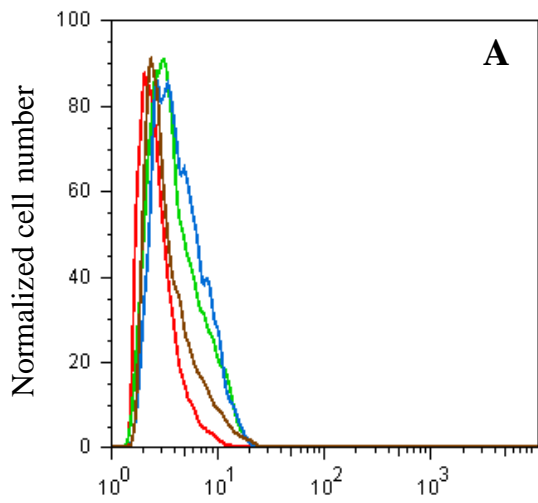

DC+ (Mk+CXCL16+CXCL7 )  
DC+ (Mk+CXCL16+CXCL7) + ATRA  
DC+ ATRA  
Untreated DC

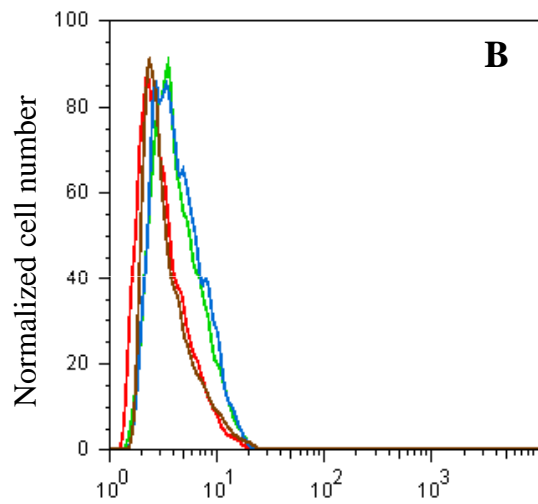

DC+ (CXCL1+CXCL8+CCL20)  
DC+ (CXCL1+CXCL8+CCL20) + ATRA  
DC+ ATRA  
Untreated DC

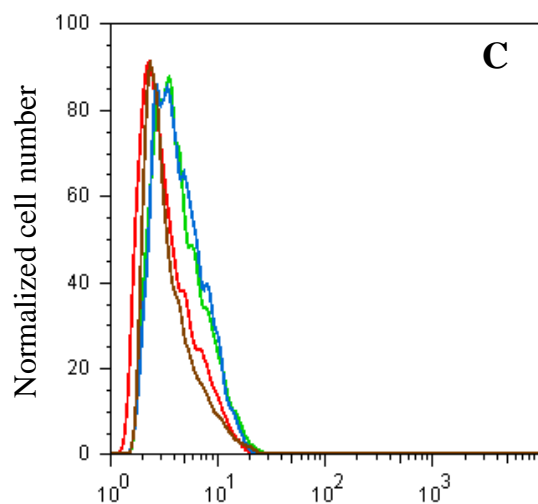

DC+ (Mk+CXCL16+CXCL7+CXCL1+CXCL8+CCL20)  
DC+ (Mk+CXCL16+CXCL7) + CXCL1+CXCL8+CCL20) + ATRA  
DC+ ATRA  
Untreated DC

CD103

Supplementary Figure 5

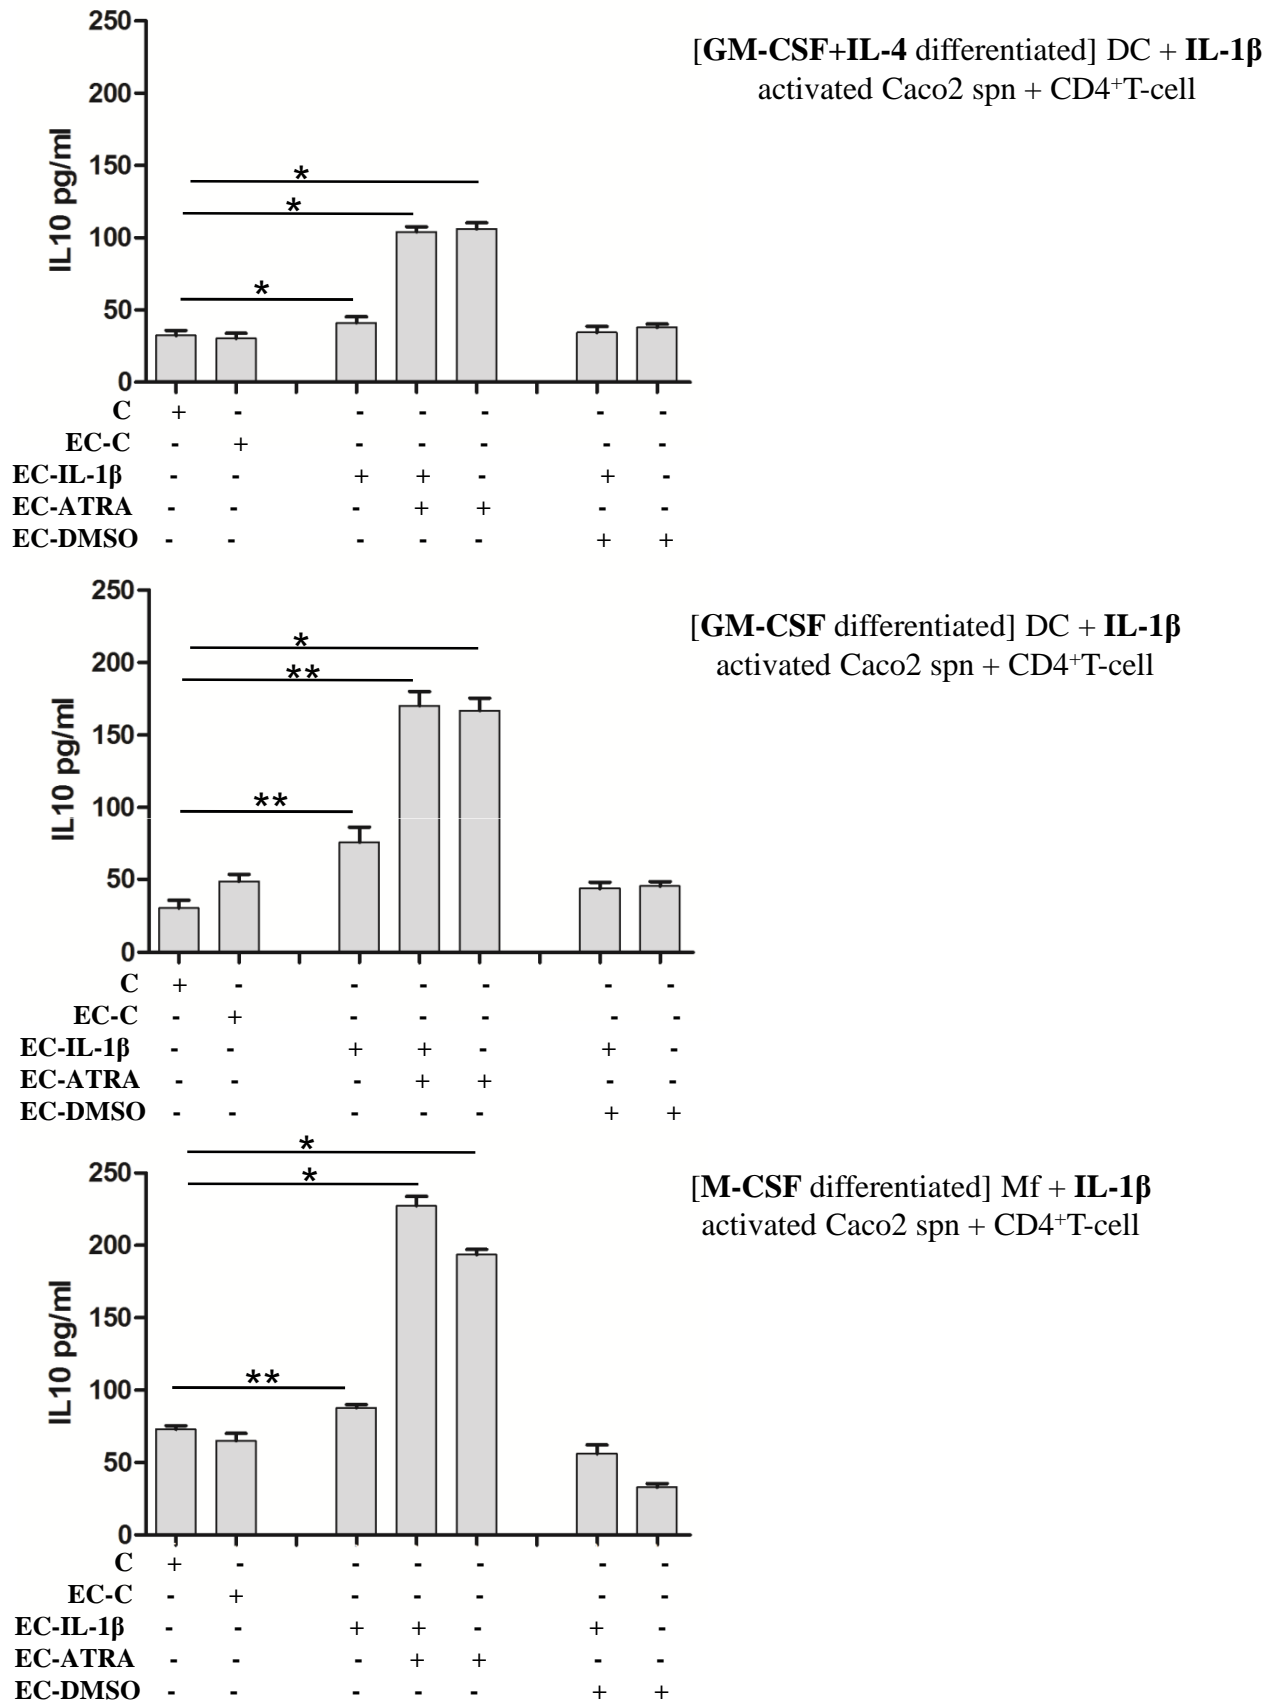

### **Supplementary Figure 3**

Caco2 cells were treated with IL-1 $\beta$  in the presence of ATRA for 1hr. The culture medium of Caco2 was removed, replaced with fresh medium and the cells were cultured for an additional 5hrs. The supernatant was collected and added to monocytes differentiating in GM-CSF+IL4 or GM-CSF. The autocrine secretion of IL-1 $\beta$  induced by the activated Caco2 supernatant was measured by ELISA. The autocrine secretion of IL-1 $\beta$  by monocyte-derived cells was observed exclusively when the monocytes were generated in the presence of GM-CSF. Bar diagrams indicate mean $\pm$ SD of 3 independent experiments \*p<0.05 \*\*p<0.01

### **Supplementary Figure 4**

**A** – DC were treated with the mixture of chemokines M $\kappa$ +CXCL16+CXCL7 in the presence and absence of ATRA. **B** – DC were exposed to the mixture of chemokines CXCL1+CXCL8+CCL20 in the presence and absence of ATRA. **C** – DC were exposed to the mixture of chemokines M $\kappa$ +CXCL16+CXCL7+CXCL1+CXCL8+CCL20 in the presence and absence of ATRA. MFI of a typical measurement out of 3 independent experiments is shown.

### **Supplementary Figure 5**

Secretion of IL-10 by CD4<sup>+</sup>T-cells after co-culturing them with DC and M $\phi$  previously 'educated' by pretreatment with ATRA conditioned Caco2 supernatant. In the figure legends, C stands for unstimulated myeloid cells co-incubated with CD4<sup>+</sup> T cells, EC-C for monocyte-derived cells 'educated' by resting Caco2 supernatant followed by co-incubation with CD4<sup>+</sup> T cells, EC-IL-1 $\beta$ , EC-TNF- $\alpha$ , EC-ATRA, EC-DMSO correspond to cultures containing monocyte-derived cells 'educated' with the supernatants of CEC pretreated with IL-1 $\beta$  or

TNF- $\alpha$  in the presence or absence of ATRA, or with DMSO used as solvent control, followed by co-incubation with CD4<sup>+</sup> T cells. Bar diagrams indicate mean $\pm$ SD of 3 independent experiments \*p<0.05 \*\*p<0.01
